# Supplementary material for: Two-dimensional natural hyperbolic materials: from polaritons modulation to applications
Source: Royal Society of Chemistry journal article supplement (doi:10.1039/d2nr04181b), 2022-01-01
Supplement: d2nr04181b1.pdf [file d2nr04181b1.pdf]

## Electronic Supplementary Information

### Two-dimensional natural hyperbolic materials: from polaritons modulation to applications

Guangyi Jia,<sup>a</sup> Jinxuan Luo,<sup>a</sup> Huaiwen Wang,<sup>a,b</sup> Qiaoyun Ma,<sup>a</sup> Qinggang Liu,<sup>c</sup> Haitao Dai<sup>d</sup> and Reza Asgari<sup>e</sup>

<sup>a</sup>School of Science, Tianjin University of Commerce, Tianjin 300134, P. R. China

<sup>b</sup>Tianjin Key Laboratory of Refrigeration Technology, Tianjin University of Commerce, Tianjin 300134, P. R. China

<sup>c</sup>State Key Laboratory of Precision Measurement Technology and Instruments, Tianjin University, Tianjin 300072, P. R. China

<sup>d</sup>Tianjin Key Laboratory of Low Dimensional Materials Physics and Preparing Technology, School of Science, Tianjin University, Tianjin 300072, P. R. China

<sup>e</sup>School of Physics, Institute for Research in Fundamental Sciences, IPM, Tehran 19395-5531, Iran

#### Lorentz model for calculating anisotropic permittivities of HMs

To describe the infrared permittivities of  $\alpha$ -MoO<sub>3</sub> and  $\alpha$ -V<sub>2</sub>O<sub>5</sub> crystals in Fig. 3 in the main article, a three-parameter Lorentz oscillator model is used with

$$\varepsilon_{jj} = \varepsilon_{jj}^{\infty} \prod_m^N \frac{(\omega_{jm}^{LO})^2 - \omega^2 - i\omega\Gamma_{jm}^{LO}}{(\omega_{jm}^{TO})^2 - \omega^2 - i\omega\Gamma_{jm}^{TO}}, \quad j = x, y, z$$

where  $\varepsilon_{jj}$  denotes the principal components of the permittivity tensor,  $\varepsilon_{jj}^{\infty}$  is the high-frequency dielectric constant. The parameters  $\omega_{jm}^{LO}$  and  $\omega_{jm}^{TO}$  represent the longitude and transverse optical phonon frequencies, respectively. The factor  $\Gamma_{jm}$  is the broadening factor of the Lorentzian lineshape. The superscripts  $x$ ,  $y$ , and  $z$  indicate three principal axes of the crystal along the crystal directions [100], [001], and [010], respectively, and  $m$  is the mode index along three crystal directions. The detailed parameter values utilized in our calculation for  $\alpha$ -MoO<sub>3</sub> and  $\alpha$ -V<sub>2</sub>O<sub>5</sub> are shown in Table S1.

**Table S1** Parameter values used for calculating the anisotropic permittivities of  $\alpha$ -MoO<sub>3</sub> and  $\alpha$ -V<sub>2</sub>O<sub>5</sub>

| HMs                                     | Crystal directions | $m$ | $\omega_{jm}^{LO}$ (cm <sup>-1</sup> ) | $\omega_{jm}^{TO}$ (cm <sup>-1</sup> ) | $\Gamma_{jm}^{LO}$ (cm <sup>-1</sup> ) | $\Gamma_{jm}^{TO}$ (cm <sup>-1</sup> ) | $\epsilon_{jj}^{\infty}$ |
|-----------------------------------------|--------------------|-----|----------------------------------------|----------------------------------------|----------------------------------------|----------------------------------------|--------------------------|
| $\alpha$ -MoO <sub>3</sub>              | [100]              | 1   | 972                                    | 820                                    | 4.0                                    | 4.0                                    | 4.0                      |
|                                         | [001]              | 1   | 851                                    | 545                                    | 4.0                                    | 4.0                                    | 5.2                      |
|                                         | [010]              | 1   | 1004                                   | 958                                    | 2.0                                    | 2.0                                    | 2.4                      |
| $\alpha$ -V <sub>2</sub> O <sub>5</sub> | [100]              | 1   | 76.2                                   | 72.4                                   | 4.2                                    | 3.6                                    | 6.559                    |
|                                         |                    | 2   | 265.5                                  | 261.0                                  | 8.0                                    | 13.0                                   |                          |
|                                         |                    | 3   | 390.5                                  | 303.0                                  | 12.2                                   | 15.0                                   |                          |
|                                         |                    | 4   | 586.0                                  | 411.0                                  | 30.0                                   | 5.0                                    |                          |
|                                         |                    | 5   | 959.0                                  | 767.5                                  | 50.0                                   | 30.0                                   |                          |
|                                         |                    | 6   | 982.0                                  | 980.5                                  | 15.0                                   | 10.0                                   |                          |
|                                         | [001]              | 1   | 490.0                                  | 473.0                                  | 15.0                                   | 18.0                                   | 6.142                    |
|                                         |                    | 2   | 1038.0                                 | 975.5                                  | 2.5                                    | 2.5                                    |                          |
|                                         | [010]              | 1   | 225.0                                  | 212.0                                  | 7.5                                    | 10.5                                   | 3.899                    |
|                                         |                    | 2   | 312.5                                  | 284.0                                  | 10.2                                   | 7.8                                    |                          |
|                                         |                    | 3   | 842.5                                  | 506.5                                  | 18.0                                   | 21.0                                   |                          |
